# Supplementary material for: A Novel Nanobody-Horseradish Peroxidase Fusion Based-Competitive ELISA to Rapidly Detect Avian Corona-Virus-Infectious Bronchitis Virus Antibody in Chicken Serum
Source: MDPI journal article supplement (doi:10.3390/ijms23147589), 2022-07-08
Supplement: s1 [file s1]

## Supplementary Information

### **A novel nanobody-horseradish peroxidase fusion based-competitive ELISA to rapidly detect Avian coronavirus-infectious bronchitis virus antibody in chicken serum**

Kui Gu<sup>1,2†</sup>, Zengxu Song<sup>1,2†</sup>, Peng Ma<sup>1,2</sup>, Chao Li<sup>1,2</sup>, Ming Yang<sup>1,2</sup>, Changyu Zhou<sup>1,2</sup>, Ziwei Liao<sup>1,2</sup>, Yu Zhao<sup>1,2</sup>, Hao Li<sup>1,2</sup>, Xin Yang<sup>1,2</sup>, Changwei Lei<sup>1,2\*</sup>, Hongning Wang<sup>1,2\*</sup>

<sup>1</sup> Key Laboratory of Bio-Resource and Eco-Environment of Ministry of Education, College of Life Sciences, Sichuan University, Chengdu, Sichuan Province, People's Republic of China.

<sup>2</sup> Animal Disease Prevention and Food Safety Key Laboratory of Sichuan Province, Chengdu, People's Republic of China.

\*Correspondence: Changwei Lei leichangwei@scu.edu.cn;

Hongning Wang whongning@163.com

†Kui Gu, and Zengxu Song contributed equally to this work and considered as co- first authors

**Table S1** Primers used for this work and the underlying sequences in the primers were restriction sites.

| Primers                       | Sequences (5'-3')                  |
|-------------------------------|------------------------------------|
| CALL001                       | GTCCTGGCTGCTCTTCTACAAGG            |
| CALL002                       | GGTACGTGCTGTTGAACTGTTCC            |
| VHH-FOR ( <i>Pst</i> I )      | CAGGTGCAGCTGCAGGAGTCTGGGGGAGR      |
| VHH-REV ( <i>Not</i> I )      | CTAGTGCGGCCGCTGAGGAGACGGTGACCTGGGT |
| MP57                          | TTATGCTTCCGGCTCGTATG               |
| GIII                          | CCACAGACAGCCCTCATAG                |
| Nb-vHRP-F ( <i>Pst</i> I )    | ATACTGCAGCAGGTGCAGCTGCAGGAG        |
| Nb-vHRP-R ( <i>Hind</i> III ) | AGTAAGCTTTGAGGAGACGGTGACCTG        |

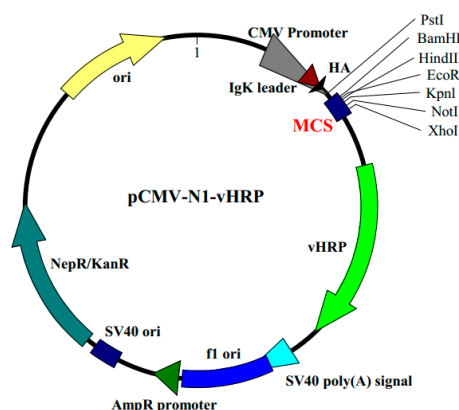

**Figure S1** Plasmid profile of pCMV-N1-vHRP vector and the sequence was listed as following:

tagttattaatagtaatcaattacggggtcattagttcatagcccatataggagttccgcgttacataactacggtaaatggcc  
cgcttggtgaccgccaacgacccccgccattgacgtcaataatgacgtatgttcccatagtaacgccaatagggacttt  
ccattgacgtcaatgggtggagtatttacggtaaaactgccacttggcagtacatcaagtgtatcatatgccaagtacgccc  
ctattgacgtcaatgacggtaaatggcccgctggcattatgccagtacatgacctatgggactttcctacttggcagtaca  
tctacgtattagtcacgtattaccatggtgatgcggttttggcagtacatcaatgggcgtggatagcgggttgactcacggg  
gatttccaagtctccacccattgacgtcaatgggagtttgtttggcacaaaatcaacgggactttccaaaatgtcgtaca  
actccgccccattgacgcaaatgggcggtaggcgtgtacgggtgggaggtctatataagcagagctggtttagtgaaccgtc  
agatccgctagcatggagaccgacaccttactgctgtgggtgctgctgttatgggtgcccggtagcaccggcgactaccca

tacgatgttccagattacgctctgcagggatccaagcttgaattcgggtaccctcgaggcggccgagtagtagtggcagt  
gggtccaccggctgccaccatggtgagcaagggcgaggagctgttcaccgggggtgggtgccatcctgggtcagctggac  
ggcgacgtaaaccggccacaagttcagcgtgtccggcgagggcgagggcgatgccacctacggcaagctgacctgaa  
gttcattctgcaccaccggcaagctgcccgtgccctggcccaccctcgtgaccaccctgacctacggcgtgcagtgttcag  
ccgctaccccgaccacatgaagcagcagcacttctcaagtccgcatgccgaaggctacgtccaggagcgcacctct  
tctcaaggacgacggcaactacaagaccgcgccgaggtgaagttcgaggcgacaccctgggtgaaccgcatcgagct  
gaagggcacgcacttcaaggaggacggcaacatcctggggcacaagctggagtacaactacaacagccacaacgtctat  
atcatggccgacaagcagaagaacggcatcaaggtgaactcaagatccgccacaacatcgaggacggcagcgtgcag  
ctcgccgaccactaccagcagaacacccccatggcgacggccccgtgctgctgcccgacaaccactacctgagcacc  
cagtccgccctgagcaaagacccaacgagaagcgcgacacatggtcctgctggagttcgtgaccgccgcccggatca  
ctctcggtatggacgagctgtacaagtaaagcggccgcgactctagatcataatcagccataccacattttagaggtttac  
ttgctttaaaaaacctccacacctccccctgaacctgaaacataaaatgaatgcaattgtgtgttaactgtttattgcagctt  
ataatggttacaataaagcaatagcatcacaatttcacaaataaagcattttttactgcattctagtgtgtgttgcctcaaac  
tcatcaatgtatcttaaggcgtaaattgtaagcgttaatatttgttaaaattcgcgttaaattttgttaaatcagctcatttttaacc  
aataggccgaaatcggaacaaatcccttataaatcaaaagaatagaccgagataggggtgagtggtgttccagtttgaacaa  
gagtcactattaaagaacgtggactccaacgtcaaagggcgaaaaaccgtctatcagggcgatggcccactacgtgaac  
catcacctaatacaagtttttggggtcgaggtgccgtaaagcactaaatcggaaccctaaaggagccccgatttagagc  
ttgacggggaaagccggcgaacgtggcgagaaaggaagggaagaaagcgaaggagcgggcgctagggcgctggc  
aagtgtagcgggtcacgtgcgcgtaaccaccacacccgccgcgttaatgcgccgtacagggcgctcaggtggcact  
ttcggggaaatgtgcgcggaaccctatttgttttttttaataacattcaaatatgtatccgctcatgagacaataaccctg  
ataaatgcttcaataatattgaaaaggaagagtcctgaggcggaaagaaccagctgtggaatgtgtgtcagttagggtgtg  
gaaagtccccaggctccccagcaggcagaagtatgcaaagcatgcatctcaattagtcagcaaccaggtgtggaagtcc  
ccaggctccccagcaggcagaagtatgcaaagcatgcatctcaattagtcagcaaccatagtcgcccccctaactccgcc  
catcccgccctaactccgccagttccgccattctccgcccatggctgactaatttttttattatgcagaggccgaggc  
cgctcggcctctgagctattccagaagtagtgaggaggctttttggaggcctaggcttttcaaagatcgatcaagagac  
aggatgaggatcgtttcgcatgattgaacaagatggattgcacgcaggttctccggccgcttgggtggagaggctattcgg  
ctatgactgggcacaaacagacaatcggtgctctgatgccgccgtgttccggctgtcagcgcagggggcggccggttctttt  
gtcaagaccgacctgtccggtgccctgaatgaactgcaagacgaggcagcgcggctatcgtggctggccacgacgggc  
gttcttgcgcagctgtgctgcagctgtcactgaagcgggaagggactggctgctattgggcgaagtgcgggggcagga  
tctcctgtcatctcacctgtcctgccgagaaagtatccatcatggctgatgcaatgcggcggctgcatacgttgatccgg

ctacctgcccattcgaccaccaagcgaaacatcgcatcgagcgagcacgtactcggatggaagccggtcttgcgatcag  
gatgatctggacgaagagcatcaggggctcgcgccagccgaactgttcgccaggctcaaggcgagcatgcccagcggc  
gaggatctcgtcgtgacctatggcgatgcctgcttgccgaatatcatggtggaaaatggccgcttttctggattcatcgactg  
tggccggctgggtgtggcggaccgctatcaggacatagcgttggctacccgtgatattgctgaagagcttggcggcgaat  
gggctgaccgcttctcgtgctttacggtatcgccgctcccattcgagcgcacgccttctatgccttcttgacgagtctt  
ctgagcgggactctgggggtcgaaatgaccgaccaagcgacgcccacctgccatcacgagatttcgattccaccgcccgc  
cttctatgaaaggttgggcttcggaatcgtttccgggacgccggctggatgatcctccagcgcgggggatctcatgctggag  
ttcttcgccaccctagggggaggctaactgaaacacggaaggagacaataccggaaggaacccgcgctatgacggca  
ataaaaagacagaataaaacgcacgggtgttgggtcgtttgtcataaacgcgggggttcgggtccagggtggcactctgtc  
gataccccaccgagaccccatggggccaatacgcccgcgtttcttctttccccaccccccccccaagtcgggtgaa  
ggcccagggtcgcagccaacgtcggggcggcaggccctgccatagcctcagggtactcatatatactttagattgatttaa  
aacttcatttttaatttaaaaggatctaggtgaagatccttttgataatctcatgacaaaaatcccttaacgtgagtttctgtcca  
ctgagcgtcagaccccgtagaaaagatcaaaggatcttcttgagatcctttttctgcgcgtaactctgctgcttgaacaaaa  
aaaaccaccgctaccagcgggtggtttgttgcggatcaagagctaccaactcttttccgaaggaactggcttcagcaga  
gcgcagataccaaatactgtccttctagtgtagccgtagttaggccaccactcaagaactctgtagcaccgcctacatacct  
cgctctgctaactctgttaccagtggctgctgccagtggcgataagtcgtgtcttaccgggttggactcaagacgatagttac  
cggataaggcgcagcggctcgggtgaacggggggttcgtgcacacagcccagcttggagcgaacgacctacaccgaa  
ctgagatacctacagcgtgagctatgagaaagcgcacgcttcccgaaggagaaaaggcggacaggtatccggtaaagc  
ggcagggtcggaacaggagagcgcacgaggagcttccagggggaacgcctggtatctttatagtcctgtcgggttctg  
ccacctctgacttgagcgtcgtttttgtgatgctcgtcagggggcggagcctatggaaaaacgccagcaacgcggcctt  
ttacgggtcctggccttttctggccttttctcacatgttcttctgcgttatcccctgattctgtggataaccgtattaccgcc  
atgcat
